# Supplementary material
Source: MDPI journal article supplement (https://www.mdpi.com/2079-6412/13/2/230)
Supplement: s1 [file s1]

# Supplementary Materials: All-Inkjet-Printed $\text{Ti}_3\text{C}_2$ MXene Capacitor for Textile Energy Storage

Eugenio Gibertini \*, Federico Lissandrello, Luca Bertoli, Prisca Viviani and Luca Magagnin \*

Dipartimento di Chimica, Materiali e Ingegneria Chimica “Giulio Natta”, Politecnico di Milano, Via Mancinelli, 7-20131 Milano, Italy

\* Correspondence: eugenio.gibertini@polimi.it (E.G.); luca.magagnin@polimi.it (L.M.)

The XRD pattern of  $\text{Ti}_3\text{AlC}_2$  (Figure S1) shows the typical set of multiple diffraction peaks relative to the MAX phase (JCPDS 98-018-2475) and no evident secondary phase as  $\text{TiC}$  were detected [1–3]. Commonly, the shift to lower diffraction angles of the (002) plane is considered as fingerprint of successful etching of Al planes [3]. After 36 h of etching, the peak of the (002) plane broadened and shifted from  $9.5^\circ$  (MAX) to  $6.7^\circ$  and  $7^\circ$  respectively. These results are well coherent with the MAX to  $\text{Ti}_3\text{C}_2$  MXene conversion as result of Al removal, introduction of functional groups on MXene surface, intercalated ions ( $\text{Li}^+$ ) and water molecules in the interlayers of hydrophilic MXenes [1,4].

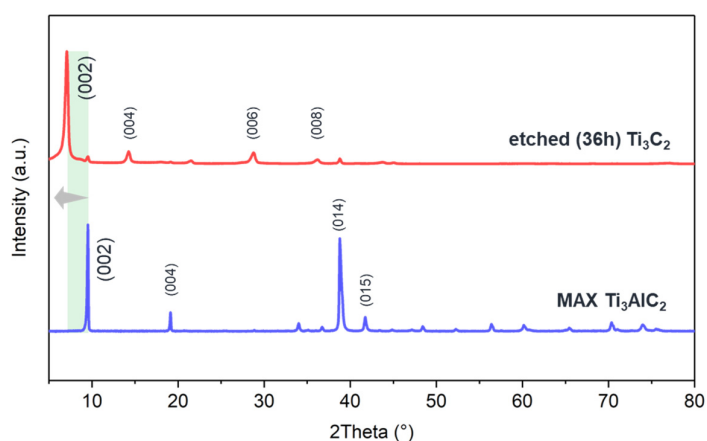

**Figure S1.** XRD patterns for the  $\text{Ti}_3\text{AlC}_2$  MAX and the etched  $\text{Ti}_3\text{C}_2$  MXene after 36 h etching.

SEM analyses are usually able to reveal multilayer MXene formation after etching. The typical layered structured of the  $\text{Ti}_3\text{AlC}_2$  MAX is clearly visible in Figure S2a. After etching process, exfoliated flakes are evident (Figure S2b) with the peculiar “open-book” morphology of the bigger flakes [3,5,6] as result of Al etching and interlayer expansion. The EDS spectra of the MAX (Figure S2c) and etched  $\text{Ti}_3\text{C}_2$  multilayer MXenes (Figure S2d) revealed a drastic decrease of the Al peak and raise of F and Cl as typically result for the  $\text{Ti}_3\text{AlC}_2$  MAX etching in the  $\text{HCl/LiF}$  system.

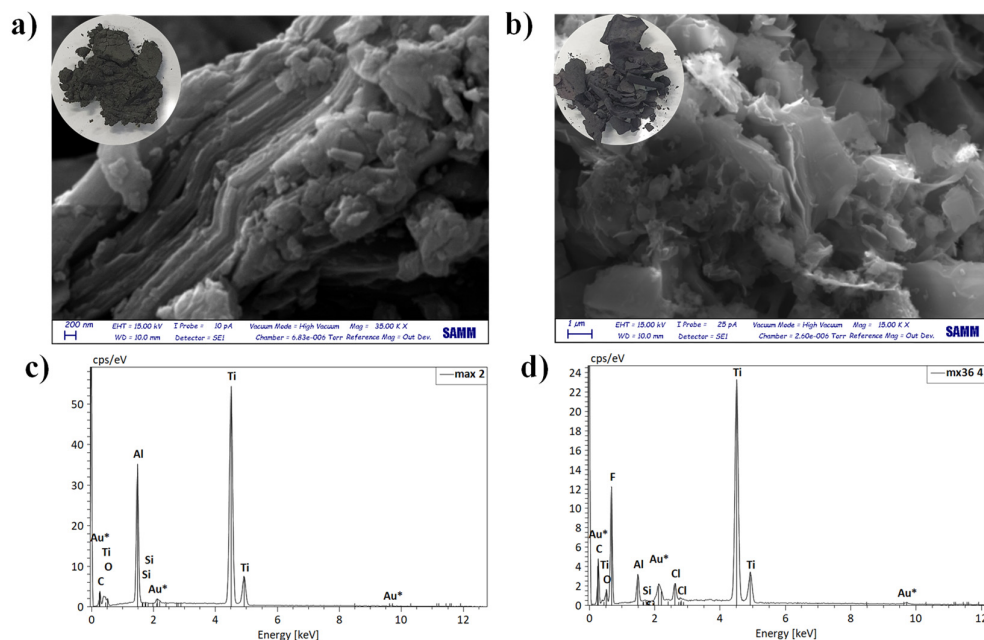

**Figure S2.** SEM images of the  $\text{Ti}_3\text{AlC}_2$  MAX (a) and multilayer etched  $\text{Ti}_3\text{C}_2$  MXene (b). In (c) and (d) the EDS spectra for the MAX and etched multilayer MXene powder are provided.

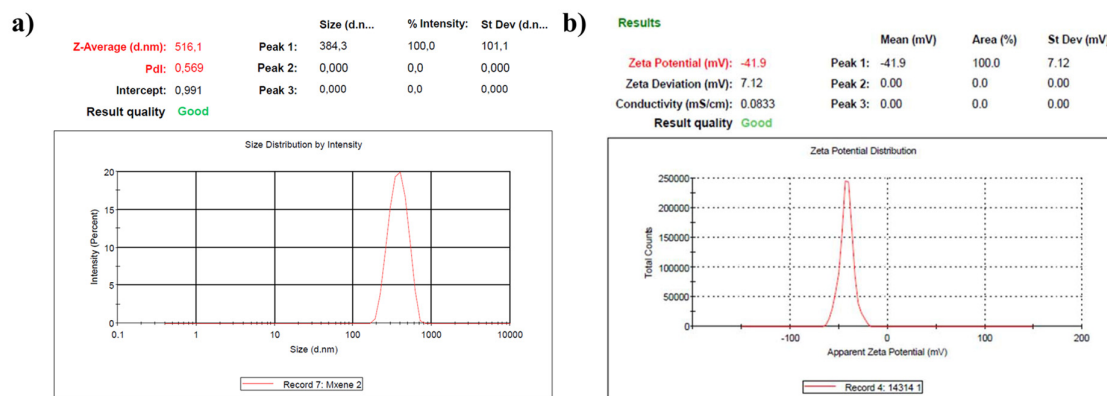

**Figure S3.** DLS (a) and Z-potential (b) file report of the  $\text{Ti}_3\text{C}_2$  ink.

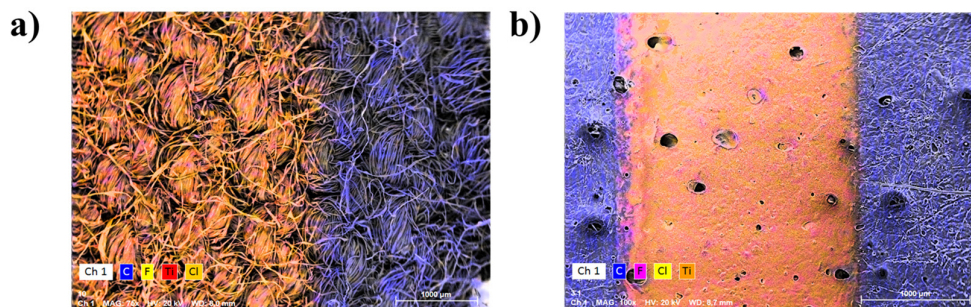

**Figure S4.** EDS image of the  $\text{Ti}_3\text{C}_2$  MXene printed on the neat cotton fabric (a) and TPU-coated fabric (b).

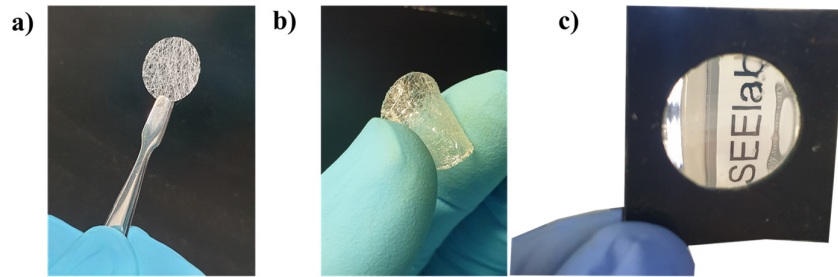

**Figure S5.** (a) a glass fibre separator was used as support matrix for ionic conductivity measurement; (b) the separator was soaked in the electrolyte precursor and then UV-cured for few seconds, a soft and flexible GPE was obtained; (c) when the electrolyte precursor was casted in a mould and then UV-cured, a free-standing transparent GPE was obtained.

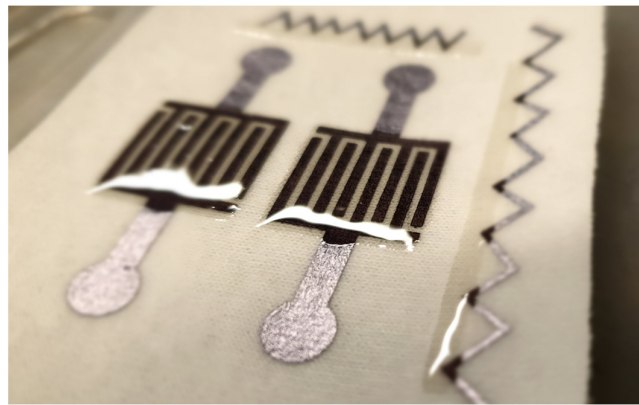

**Figure S6.** Real picture of a 1.5 cm<sup>2</sup> a-IJPSC produced with 0.6 mm interelectrode spacing, Ti<sub>3</sub>C<sub>2</sub> 20 L and electrolyte 30 L. The UV-cured GPE is clearly visible as a reflecting transparent coating on top.

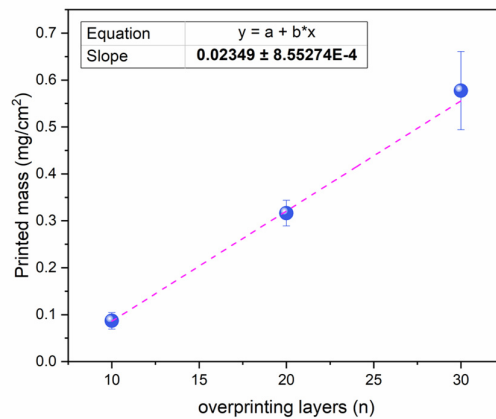

**Figure S7.** The printed Ti<sub>3</sub>C<sub>2</sub> mass/layer normalized on printed area.

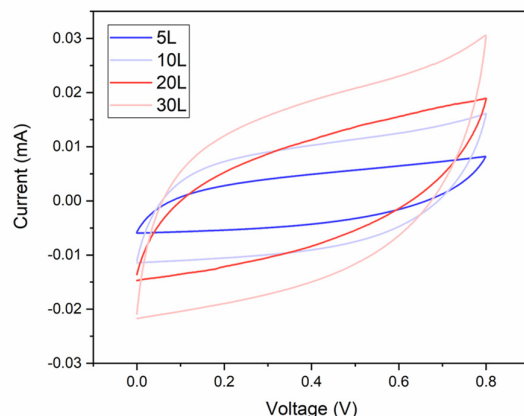

**Figure S8.** Cyclic voltammeteries at 5 mV/s for a-IJPSC devices printed on TPU/Co with increasing  $\text{Ti}_3\text{C}_2$  overprinting layers and 30 L of electrolyte precursor printing.

## References

1. Naguib, M.; Kurtoglu, M.; Presser, V.; Lu, J.; Niu, J.; Heon, M.; Hultman, L.; Gogotsi, Y.; Barsoum, M.W. Two-Dimensional Nanocrystals Produced by Exfoliation of  $\text{Ti}_3\text{AlC}_2$ . *Adv. Mater.* **2011**, *23*, 4248–4253. <https://doi.org/10.1002/adma.201102306>.
2. Zhou, A.; Wang, C.-A.; Hunag, Y. Synthesis and Mechanical Properties of  $\text{Ti}_3\text{AlC}_2$  by Spark Plasma Sintering. *J. Mater. Sci.* **2003**, *38*, 3111–3115. <https://doi.org/10.1023/A:1024777213910>.
3. Shekhiriev, M.; Shuck, C.E.; Sarycheva, A.; Gogotsi, Y. Characterization of MXenes at Every Step, from Their Precursors to Single Flakes and Assembled Films. *Prog. Mater. Sci.* **2021**, *120*, 100757. <https://doi.org/10.1016/j.pmatsci.2020.100757>.
4. Zeraati, A.S.; Mirkhani, S.A.; Sun, P.; Naguib, M.; Braun, P.V.; Sundararaj, U. Improved Synthesis of  $\text{Ti}_3\text{C}_2\text{T}_x$  MXenes Resulting in Exceptional Electrical Conductivity, High Synthesis Yield, and Enhanced Capacitance. *Nanoscale* **2021**, *13*, 3572–3580. <https://doi.org/10.1039/D0NR06671K>.
5. Alhabeib, M.; Maleski, K.; Anasori, B.; Lelyukh, P.; Clark, L.; Sin, S.; Gogotsi, Y. Guidelines for Synthesis and Processing of Two-Dimensional Titanium Carbide ( $\text{Ti}_3\text{C}_2\text{T}_x$  MXene). *Chem. Mater.* **2017**, *29*, 7633–7644, doi:10.1021/acs.chemmater.7b02847.
6. Naguib, M.; Mashtalir, O.; Carle, J.; Presser, V.; Lu, J.; Hultman, L.; Gogotsi, Y.; Barsoum, M.W. Two-Dimensional Transition Metal Carbides. *ACS Nano* **2012**, *6*, 1322–1331. <https://doi.org/10.1021/nn204153h>.
